# Supplementary material
Source: publisher figshare collection journal article supplement (https://tandf.figshare.com/ndownloader/files/19657517)
Supplement: Supplementary file 1 [file 19657517]

#NEXUS
[written Fri Aug 02 10:12:42 CST 2019 by Mesquite  version 3.6 (build 917) at DESKTOP-3V520F0/124.16.246.23]

BEGIN TAXA;
	TITLE Taxa;
	DIMENSIONS NTAX=14;
	TAXLABELS
		Heomys Tuscahomys Orientocylindrodonon Proardynomys Gobiocylindrodon Pseudocylindrodon Ardynomys Cylindrodon Pareumys Anomoemys Jaywilsonomys Dolocylindrodon Polinaomys Mysops 
	;

END;


BEGIN CHARACTERS;
	TITLE  Character_Matrix;
	DIMENSIONS  NCHAR=40;
	FORMAT DATATYPE = STANDARD RESPECTCASE GAP = - MISSING = ? SYMBOLS = "  0 1 2 3 4";
	CHARSTATELABELS 
		1 Character_20,
		2 Character_0,
		3 Character_2,
		4 Character_4,
		5 Character_5,
		6 Character_13,
		7 Character_14,
		8 Character_15,
		9 Character_19,
		10 Character_21,
		11 Character_26,
		12 Character_29,
		13 Character_37,
		14 Character_18,
		15 Character_1,
		16 Character3,
		17 Character_6,
		18 Character_7,
		19 Character_11,
		20 Character_12,
		21 Character_24,
		22 Character_25,
		23 Character_31,
		24 Character_32,
		25 Character_34,
		26 Character_38,
		27 Character_39,
		28 Character_40,
		29 Character_17,
		30 Character8,
		31 Character_9,
		32 Character_10,
		33 Character_22,
		34 Character_23,
		35 Character_28,
		36 Character_30,
		37 Character_33,
		38 Character_35,
		39 Character_36,
		40 Character_27 ; 
	MATRIX
	Heomys                10021120102011000110110?1???0011000003?0
	Tuscahomys            100011201121??01111000001000010131100001
	Orientocylindrodonon  10101211??????1111?0?????????1?1????????
	Proardynomys          ?????000?010??????11110000?0012022211113
	Gobiocylindrodon      1??0?0101120???1111011000010012112111102
	Pseudocylindrodon     ?000000000000011111111111111122222222223
	Ardynomys             ?00??10100000121?11111210111122022222223
	Cylindrodon           ?120010100000121011111210111132222222223
	Pareumys              0011112110001011102011110010022122211103
	Anomoemys             ?02100001000??21112111210???1212322222?3
	Jaywilsonomys         00011210100010011020101101??1222222221?3
	Dolocylindrodon       ?000000000001?21011111110111?220222223?3
	Polinaomys            10131011?000??110120111110?1??2022222??3
	Mysops                1001012011101001000011000110012122110104

;

END;
BEGIN ASSUMPTIONS;
	TYPESET * UNTITLED   =  unord:  1- 40;

END;

BEGIN MESQUITECHARMODELS;
	ProbModelSet * UNTITLED   =  'Mk1 (est.)':  1- 40;
END;

Begin MESQUITE;
		MESQUITESCRIPTVERSION 2;
		TITLE AUTO;
		tell ProjectCoordinator;
		timeSaved 1564711963003;
		getEmployee #mesquite.minimal.ManageTaxa.ManageTaxa;
		tell It;
			setID 0 1043725461047129452;
		endTell;
		getEmployee #mesquite.charMatrices.ManageCharacters.ManageCharacters;
		tell It;
			setID 0 1555861607687164715;
			mqVersion 360;
			checksumv 0 3 2940530379 null  getNumChars 40 numChars 40 getNumTaxa 14 numTaxa 14   short true   bits 31   states 31   sumSquaresStatesOnly 3685.0 sumSquares 3685.0 longCompressibleToShort false usingShortMatrix true   NumFiles 1 NumMatrices 1;
			mqVersion;
		endTell;
		getWindow;
		tell It;
			suppress;
			setResourcesState false false 100;
			setPopoutState 300;
			setExplanationSize 0;
			setAnnotationSize 0;
			setFontIncAnnot 0;
			setFontIncExp 0;
			setSize 1920 961;
			setLocation -8 -8;
			setFont SanSerif;
			setFontSize 10;
			getToolPalette;
			tell It;
			endTell;
			desuppress;
		endTell;
		getEmployee  #mesquite.charMatrices.BasicDataWindowCoord.BasicDataWindowCoord;
		tell It;
			showDataWindow #1555861607687164715 #mesquite.charMatrices.BasicDataWindowMaker.BasicDataWindowMaker;
			tell It;
				getWindow;
				tell It;
					setExplanationSize 30;
					setAnnotationSize 20;
					setFontIncAnnot 0;
					setFontIncExp 0;
					setSize 1820 889;
					setLocation -8 -8;
					setFont SanSerif;
					setFontSize 10;
					getToolPalette;
					tell It;
					endTell;
					setActive;
					setTool mesquite.charMatrices.BasicDataWindowMaker.BasicDataWindow.arrow;
					colorCells  #mesquite.charMatrices.NoColor.NoColor;
					colorRowNames  #mesquite.charMatrices.TaxonGroupColor.TaxonGroupColor;
					colorColumnNames  #mesquite.charMatrices.CharGroupColor.CharGroupColor;
					colorText  #mesquite.charMatrices.NoColor.NoColor;
					setBackground White;
					toggleShowNames on;
					toggleShowTaxonNames on;
					toggleTight off;
					toggleThinRows off;
					toggleShowChanges on;
					toggleSeparateLines off;
					toggleShowStates on;
					toggleAutoWCharNames on;
					toggleAutoTaxonNames off;
					toggleShowDefaultCharNames off;
					toggleConstrainCW on;
					toggleBirdsEye off;
					toggleShowPaleGrid off;
					toggleShowPaleCellColors off;
					toggleShowPaleExcluded off;
					togglePaleInapplicable on;
					togglePaleMissing off;
					toggleShowBoldCellText off;
					toggleAllowAutosize on;
					toggleColorsPanel off;
					toggleDiagonal on;
					setDiagonalHeight 80;
					toggleLinkedScrolling on;
					toggleScrollLinkedTables off;
				endTell;
				showWindow;
				getWindow;
				tell It;
					forceAutosize;
				endTell;
				getEmployee #mesquite.charMatrices.AlterData.AlterData;
				tell It;
					toggleBySubmenus off;
				endTell;
				getEmployee #mesquite.charMatrices.ColorByState.ColorByState;
				tell It;
					setStateLimit 9;
					toggleUniformMaximum on;
				endTell;
				getEmployee #mesquite.charMatrices.ColorCells.ColorCells;
				tell It;
					setColor Red;
					removeColor off;
				endTell;
				getEmployee #mesquite.categ.StateNamesStrip.StateNamesStrip;
				tell It;
					showStrip off;
				endTell;
				getEmployee #mesquite.charMatrices.AnnotPanel.AnnotPanel;
				tell It;
					togglePanel off;
				endTell;
				getEmployee #mesquite.charMatrices.CharReferenceStrip.CharReferenceStrip;
				tell It;
					showStrip off;
				endTell;
				getEmployee #mesquite.charMatrices.QuickKeySelector.QuickKeySelector;
				tell It;
					autotabOff;
				endTell;
				getEmployee #mesquite.charMatrices.SelSummaryStrip.SelSummaryStrip;
				tell It;
					showStrip off;
				endTell;
				getEmployee #mesquite.categ.SmallStateNamesEditor.SmallStateNamesEditor;
				tell It;
					panelOpen true;
				endTell;
			endTell;
		endTell;
		endTell;
end;
